# Supplementary material
Source: PubMed Central journal article supplement (PMC6987844)
Supplement: mmc7.pdf [file mmc7.pdf]

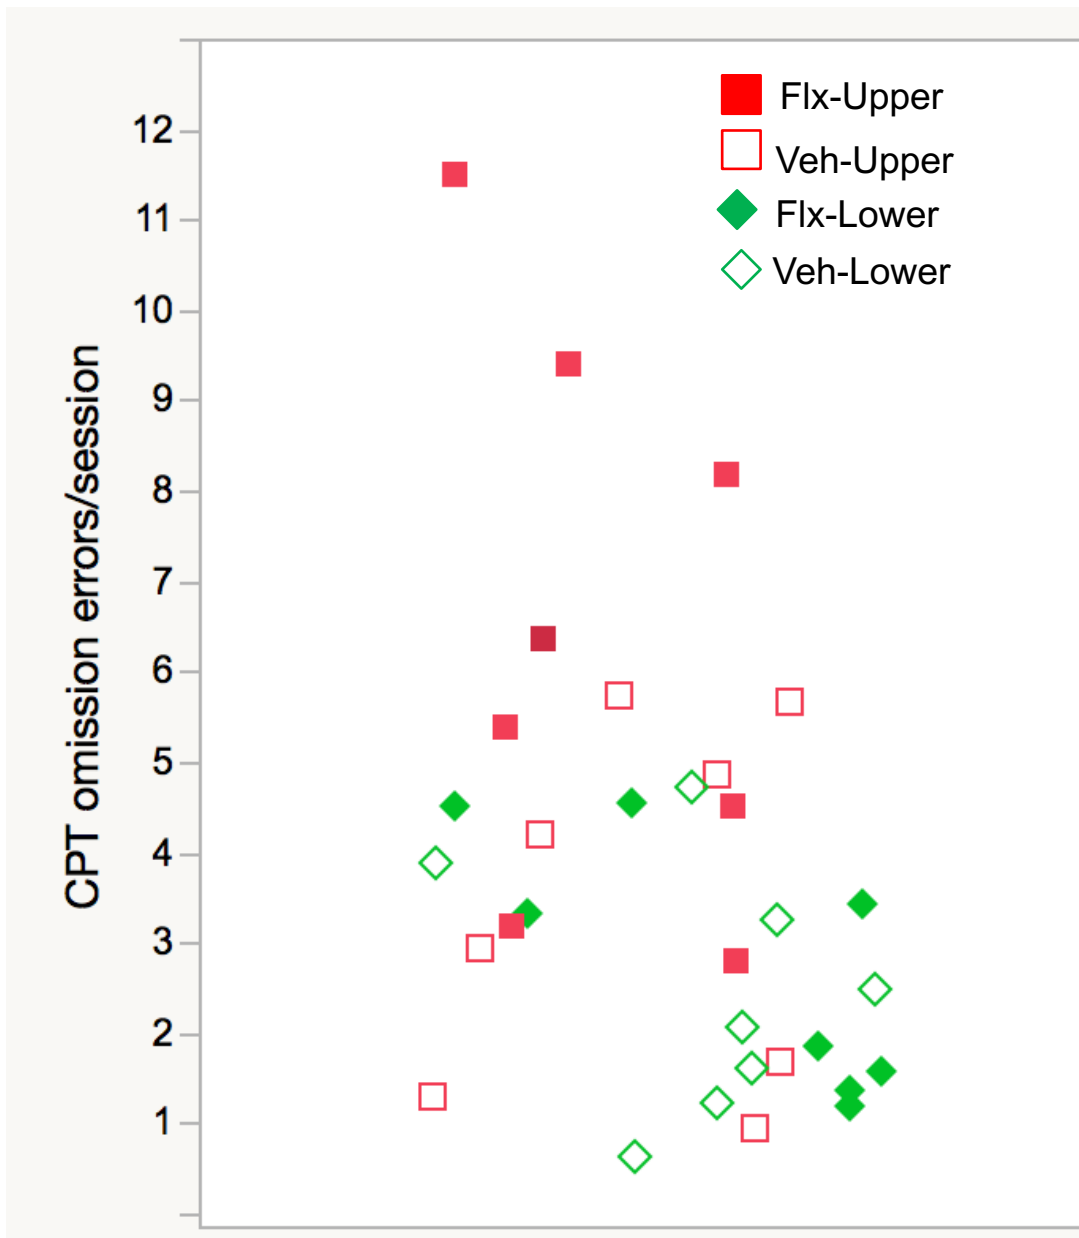

Figure S1. CPT omission errors during dosing. Scatter plot of individual animals jittered to avoid overlap. Flx=fluoxetine; Veh=vehicle; Upper=upper tier; Lower=lower tier
